# Supplementary material
Source: publisher figshare collection journal article supplement (https://tandf.figshare.com/ndownloader/files/16891547)
Supplement: Supplementary file 1 [file 16891547]

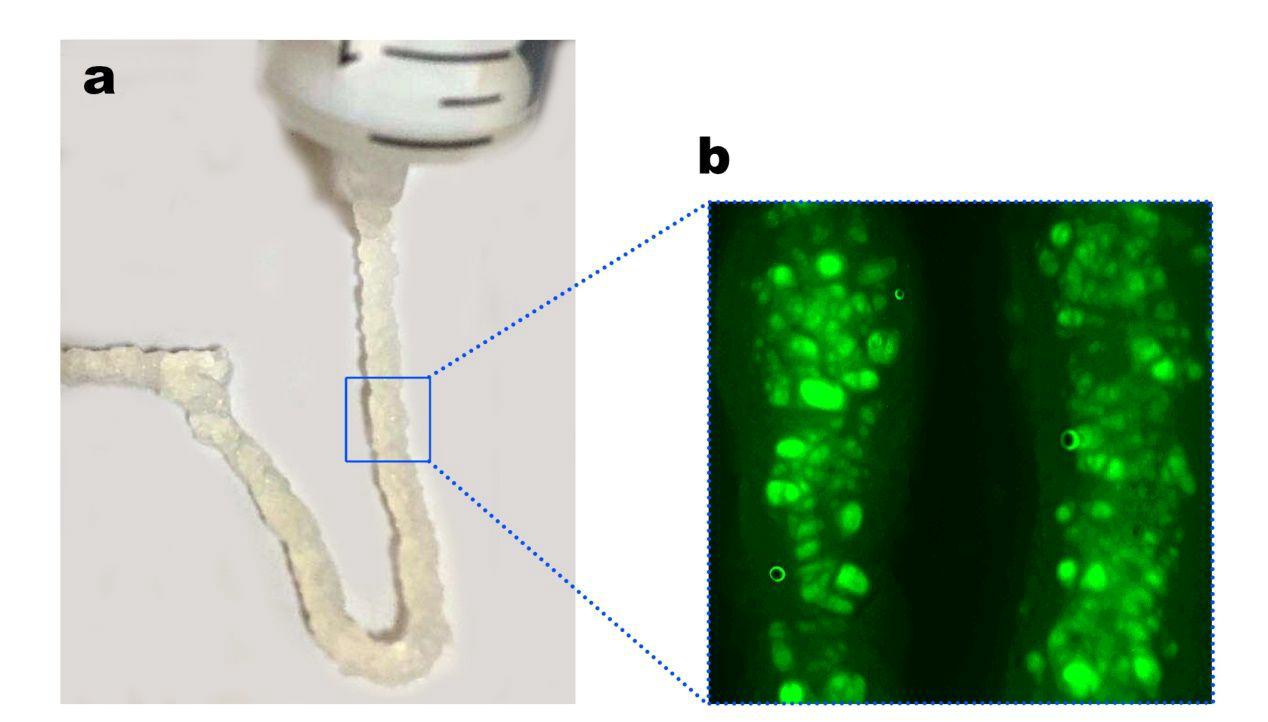


Figs.1. Preparation of the cell/collagen gel complex. (a) Injectable collagen gel. (b) Embedded cells were detected by green fluorescence protein (GFP)
